# Supplementary material for: Impact of BECLIN1 haploinsufficiency on goblet cell function and susceptibility to colitis
Source: Research Square preprint supplement (doi:10.21203/rs.3.rs-7567745/v1), 2025-09-19

**Figure 1A.**

**Duodenum**

Anti-BECLIN1

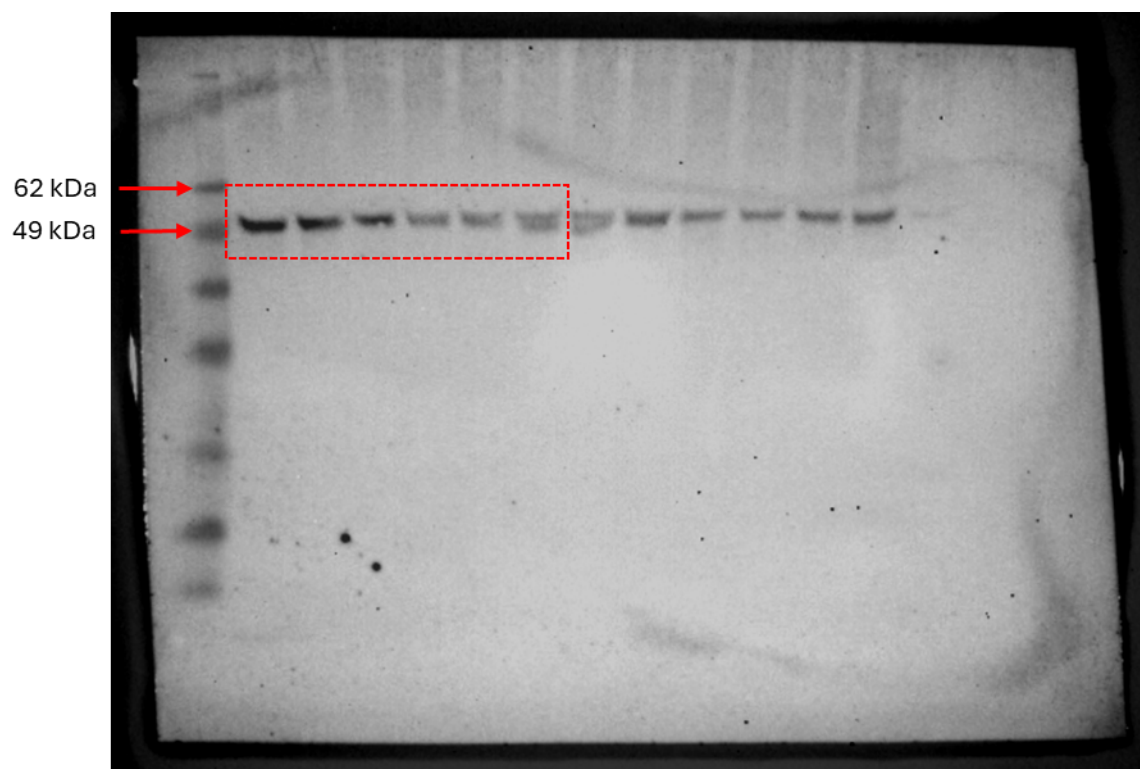

Anti-GAPDH

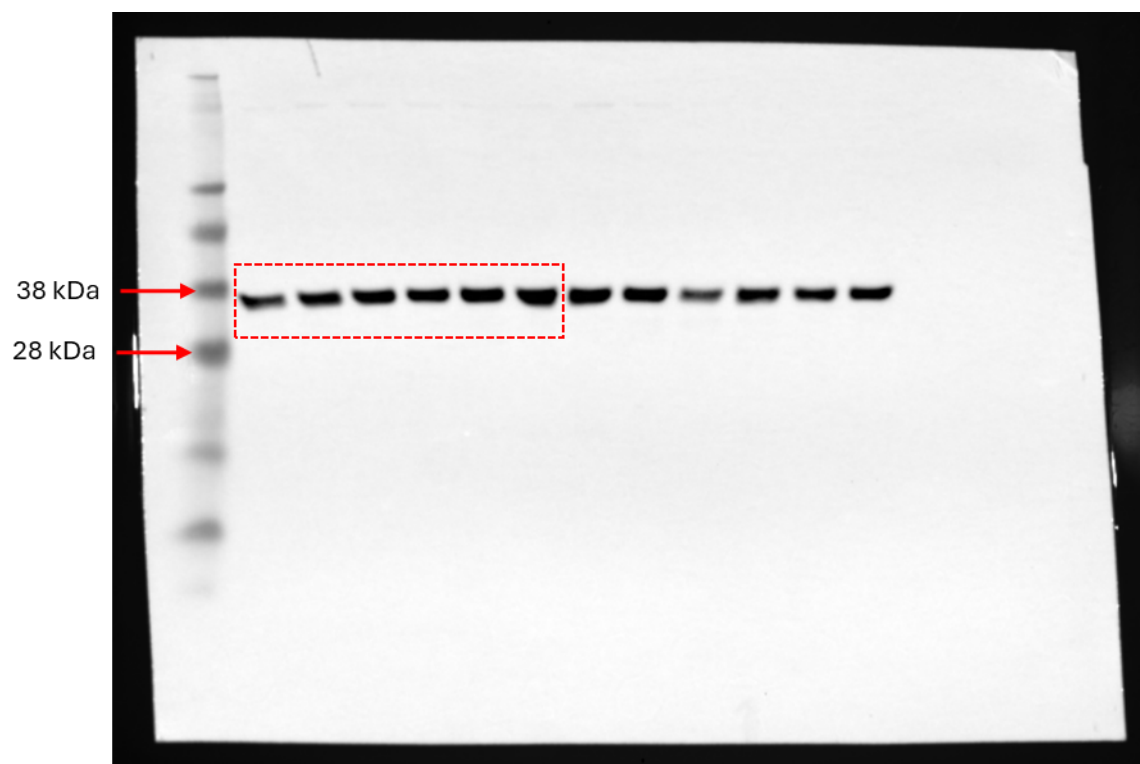

## Jejunum

### Anti-BECLIN1

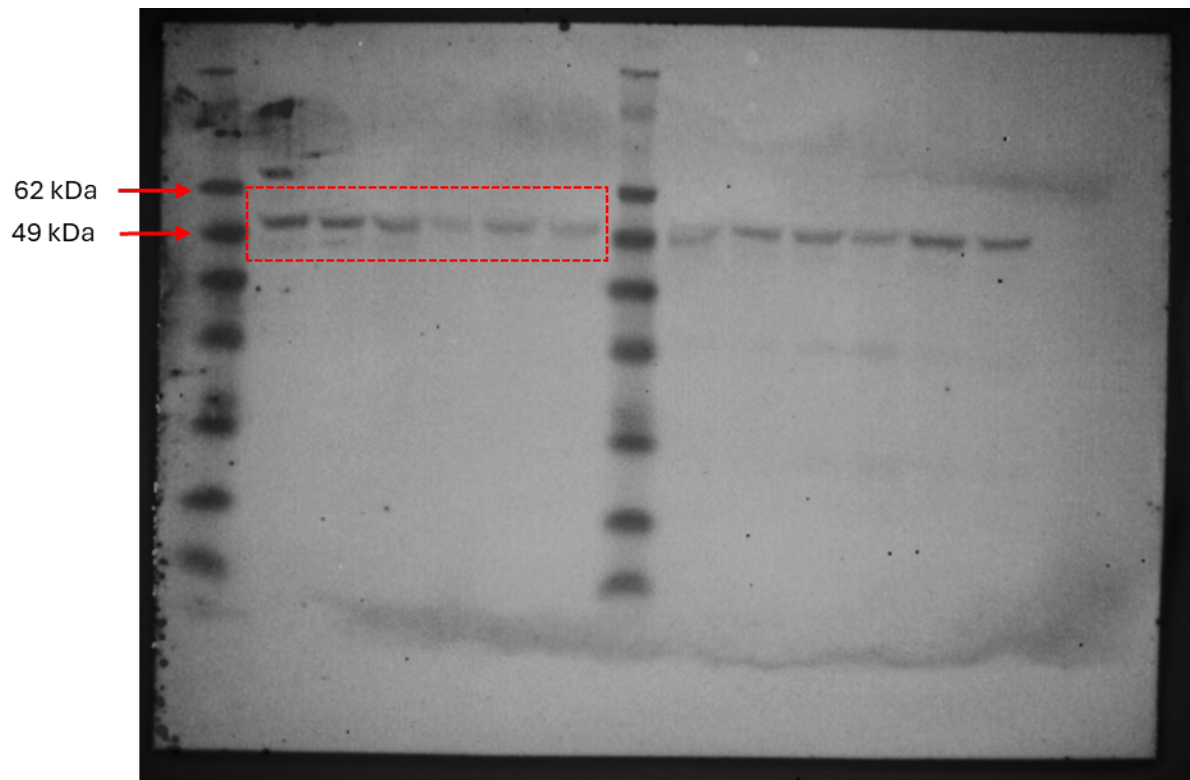

### Anti-GAPDH

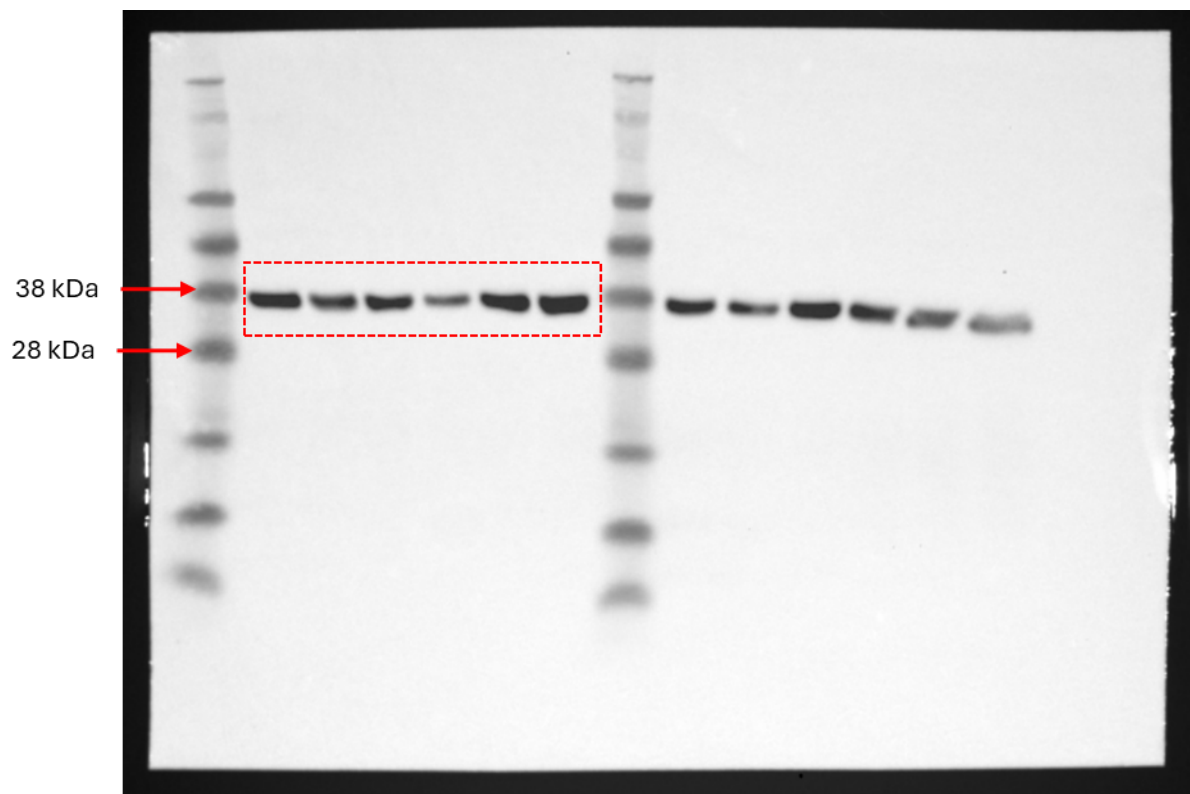

## Ileum

### Anti-BECLIN1

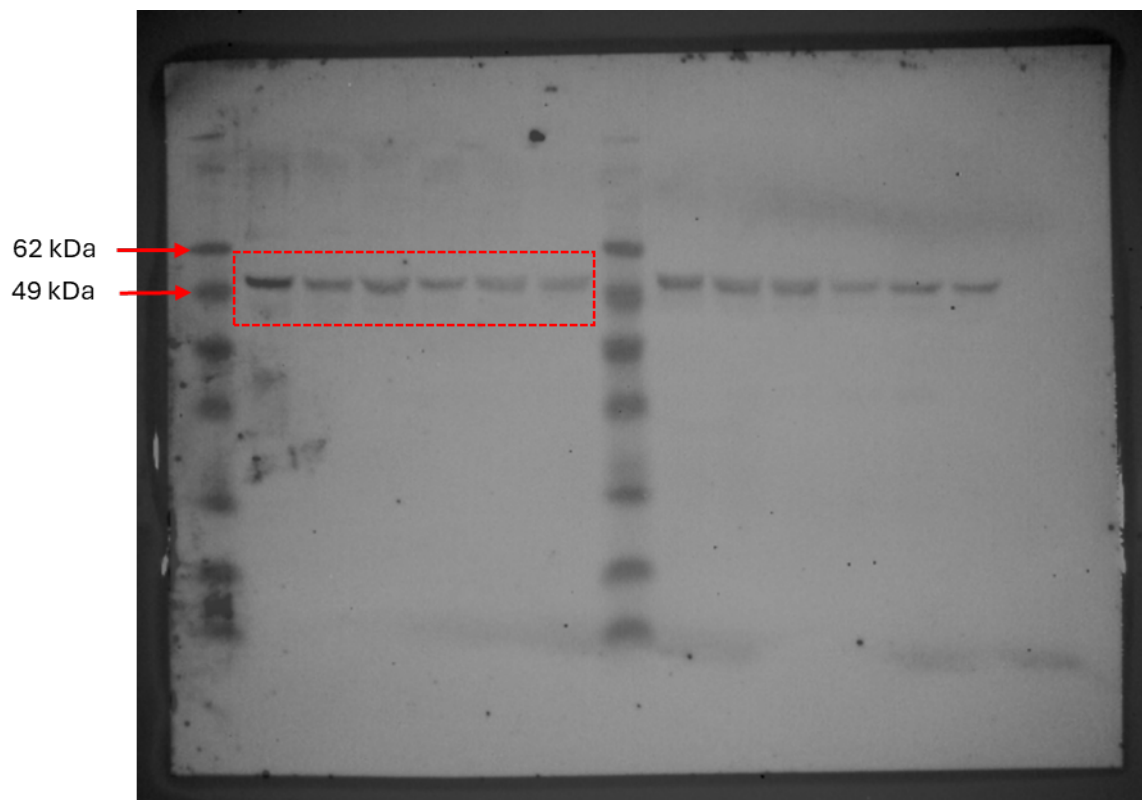

### Anti-GAPDH

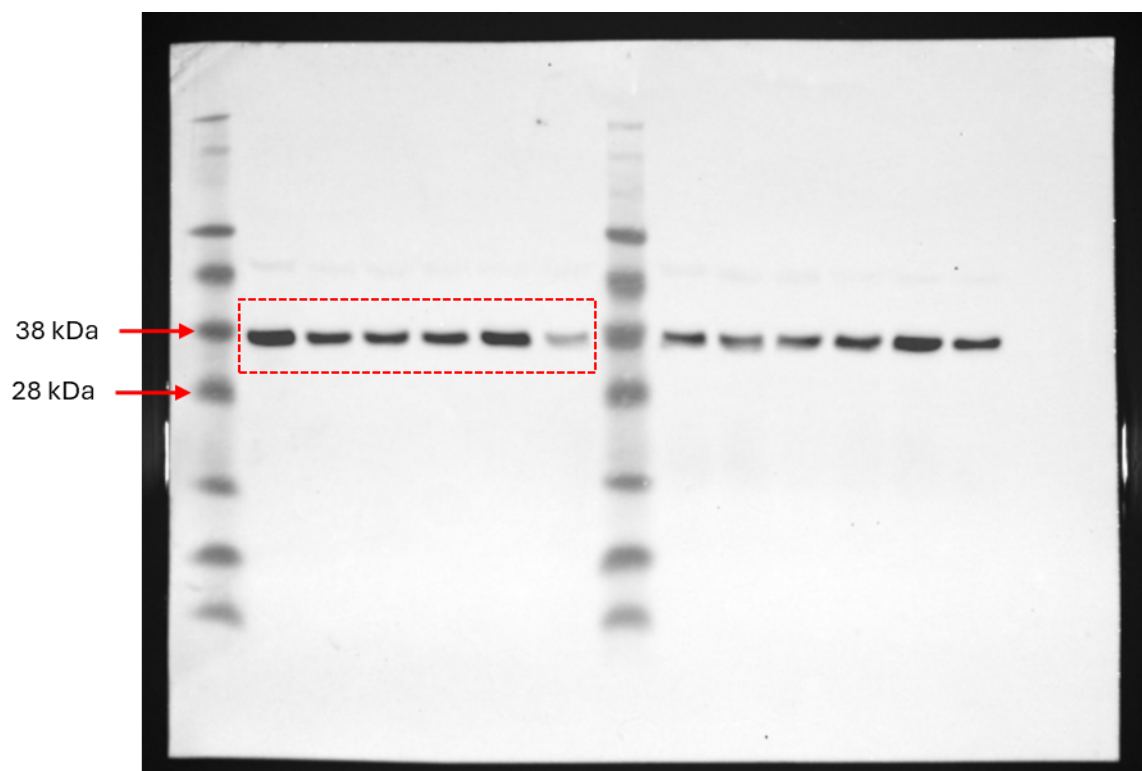

## Colon

Anti-BECLIN1

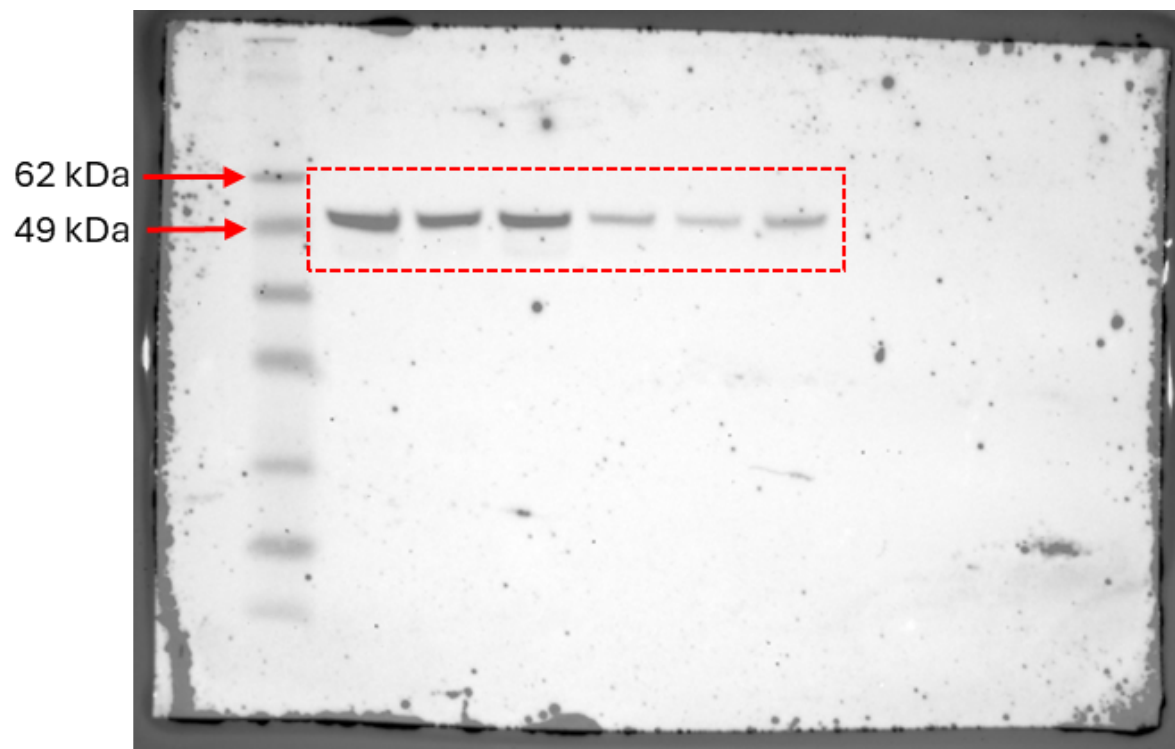

Anti-GAPDH

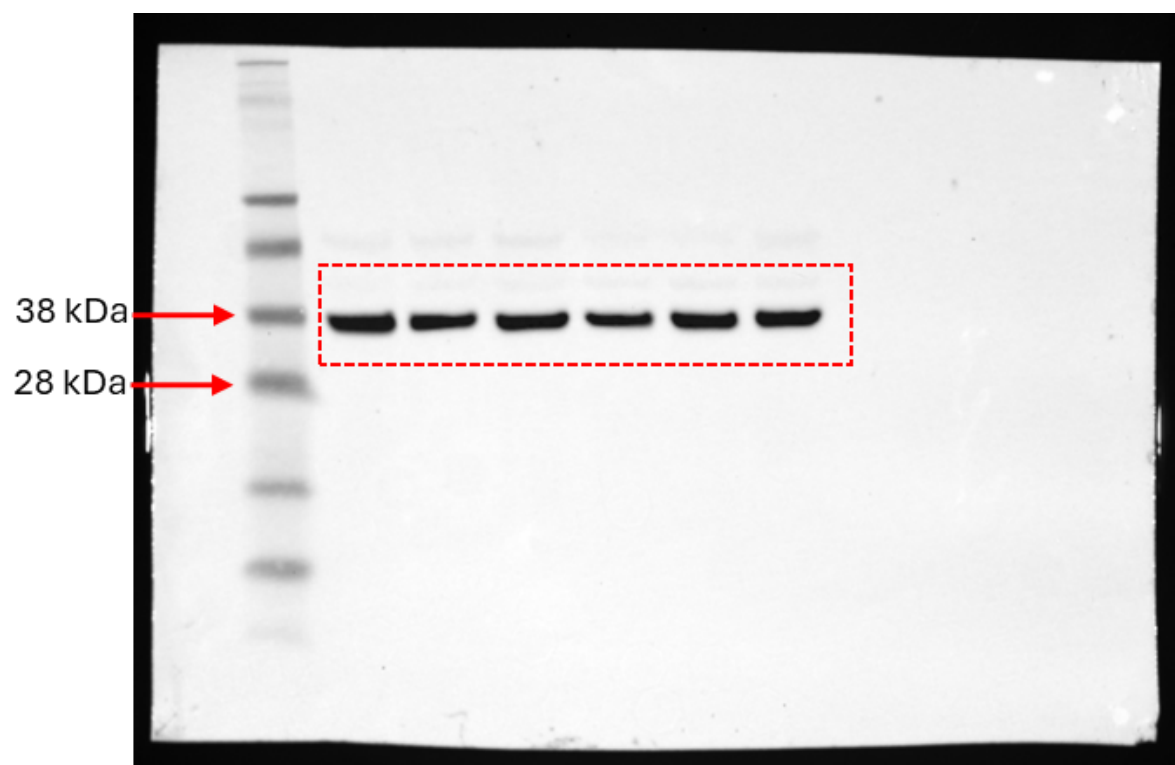

**Figure 1E**

Anti-P62

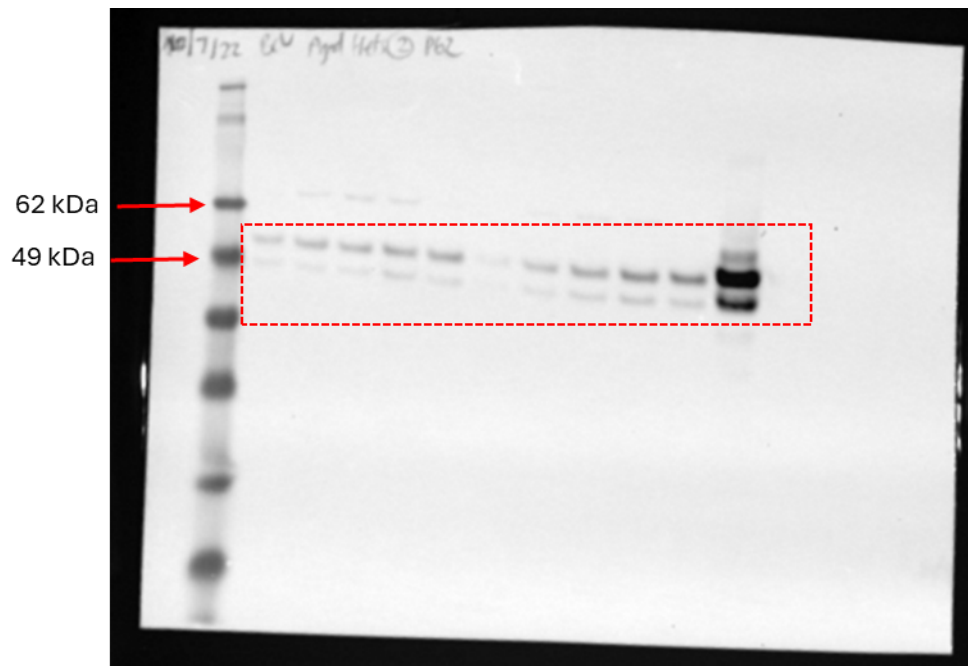

Anti-LC3B

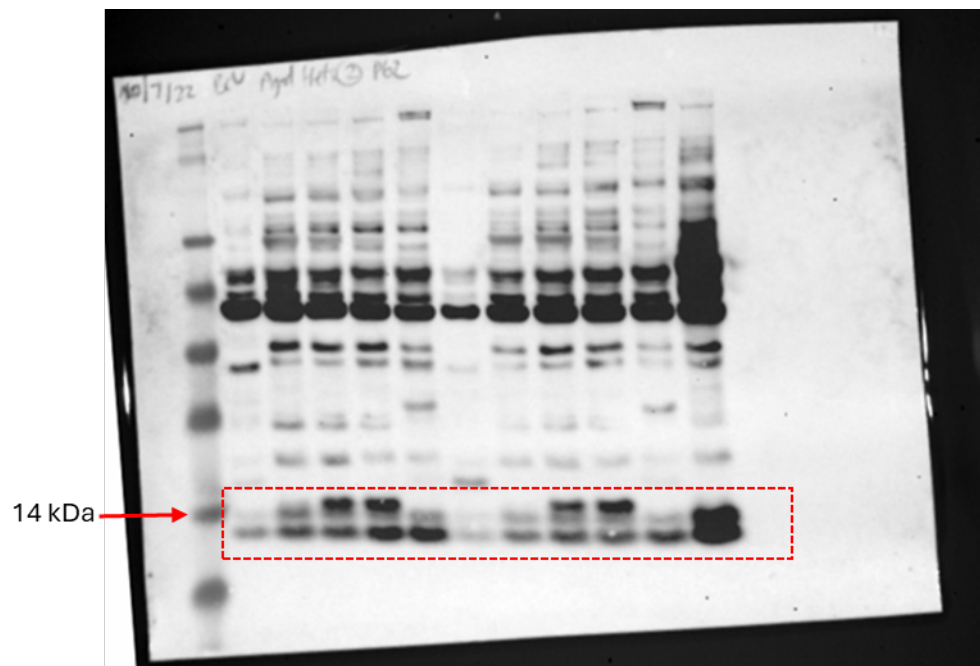

Anti- $\beta$ -ACTIN

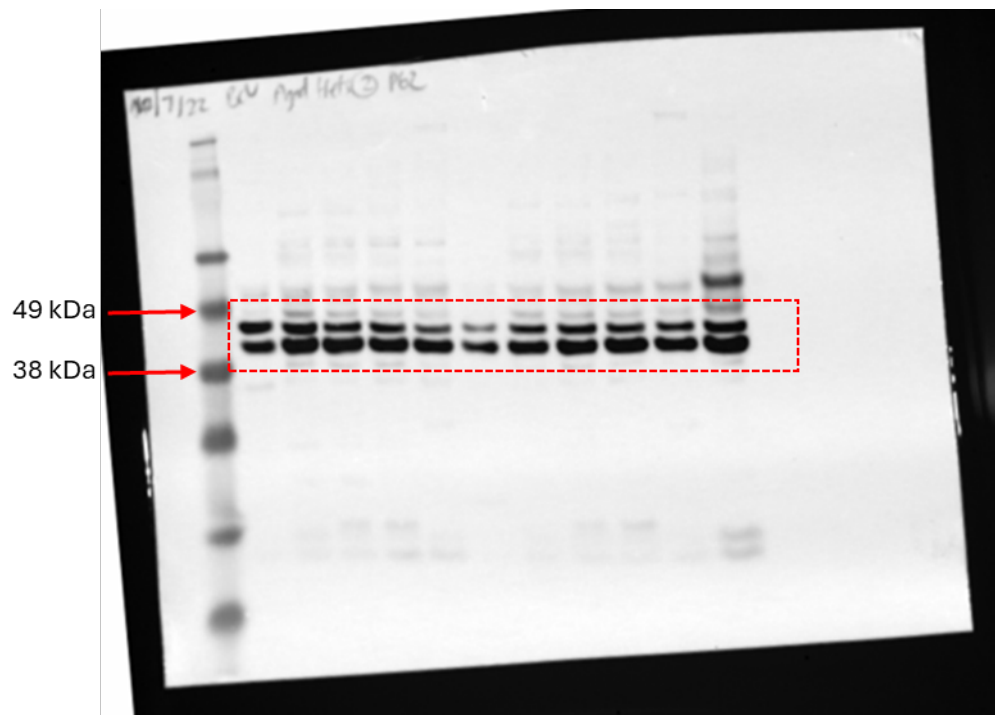

**Supplementary Figure 2A**

Anti-BECLIN1

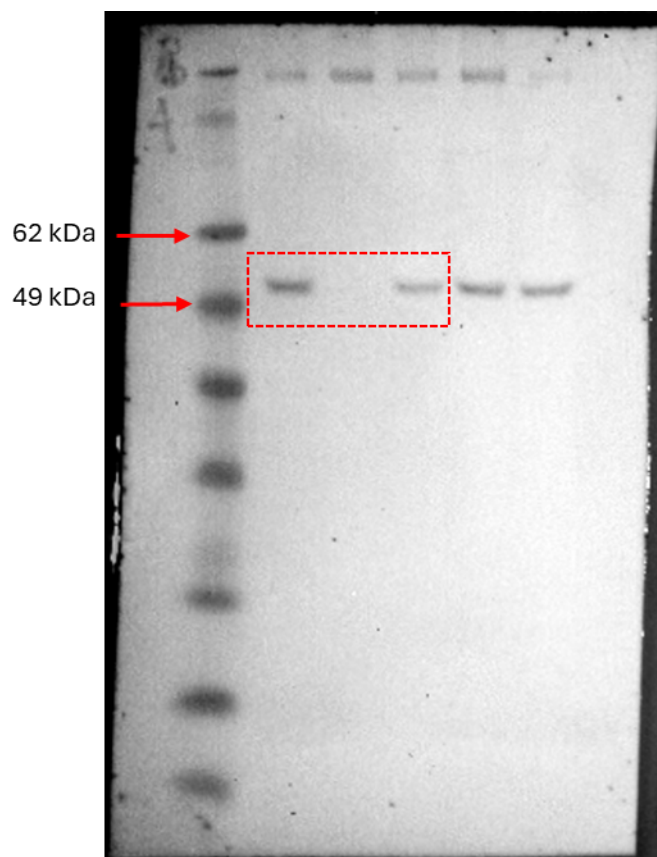

Anti-GAPDH

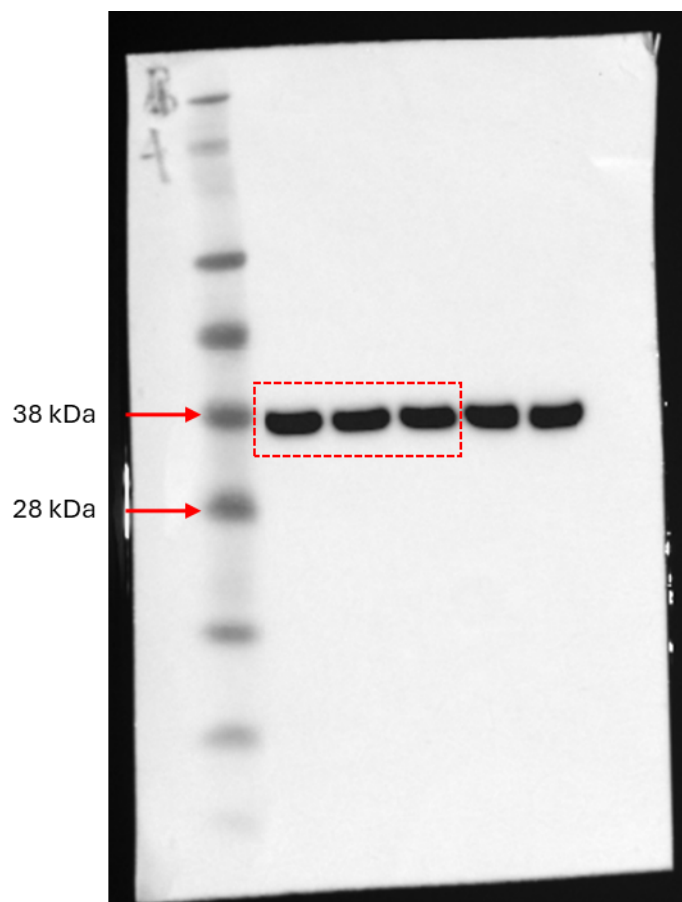



## Supplementary Figure 2B

Anti-P62

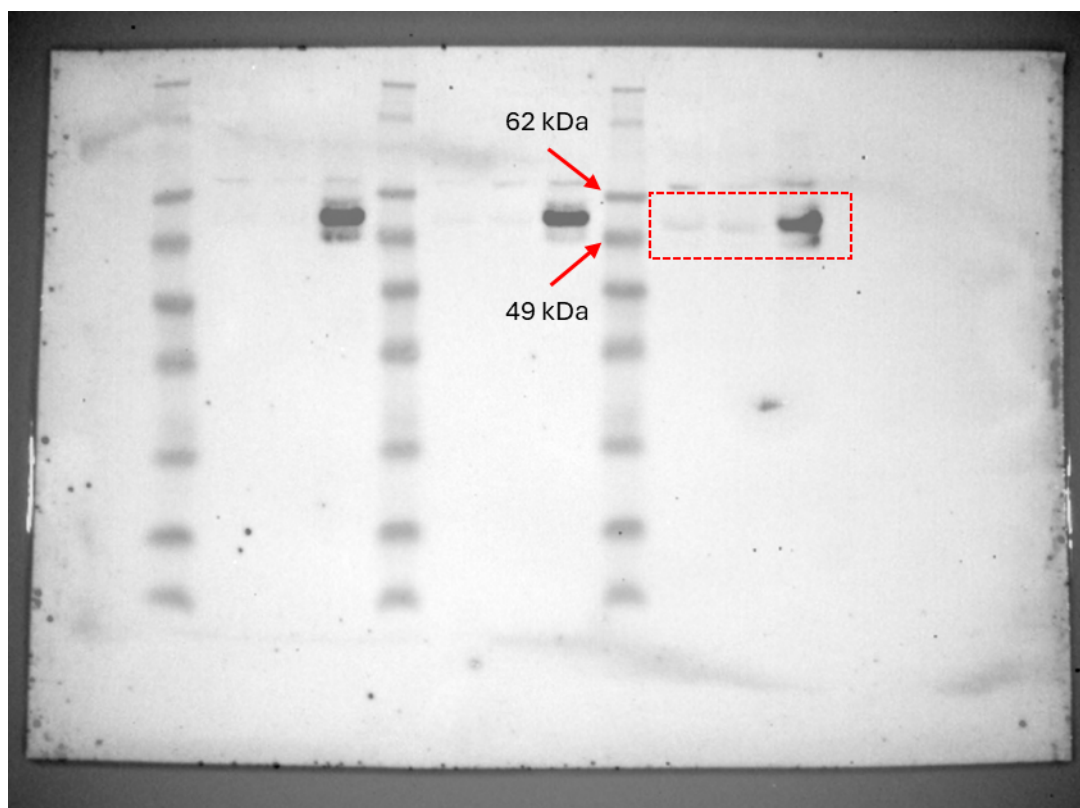

Anti-LC3B

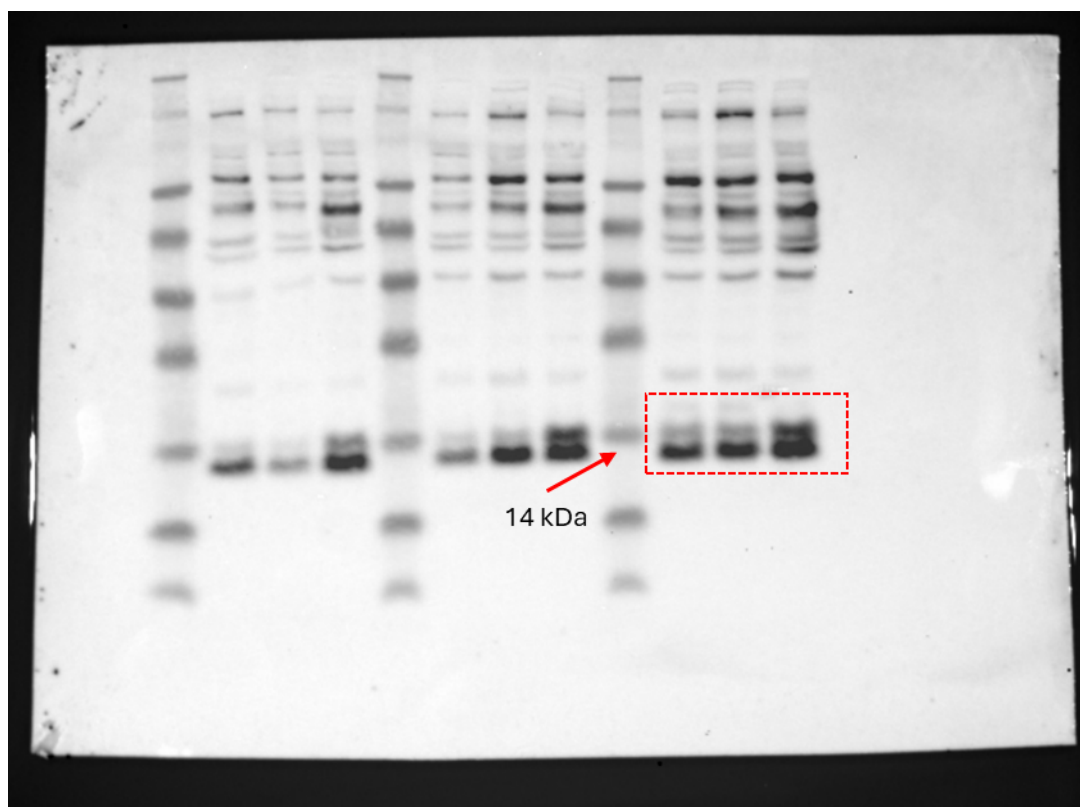



Anti-GAPDH

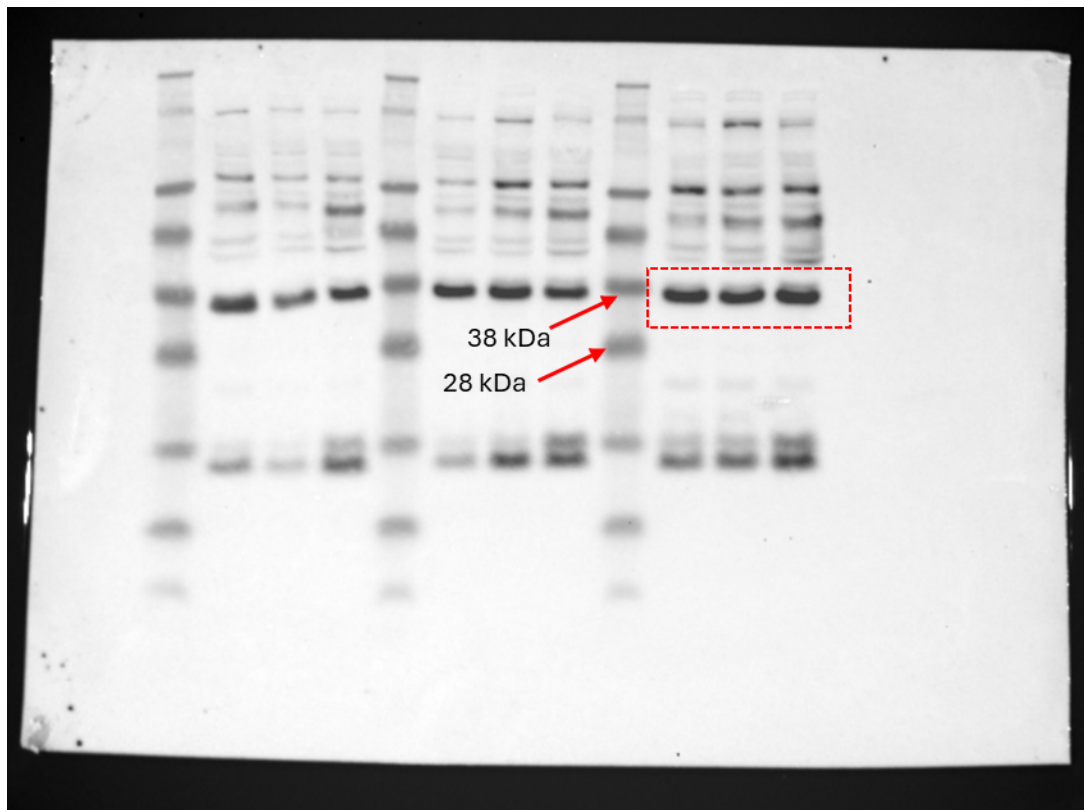

Supplement: Supplementary file 1 [file 2a8ef6a6ec94c454250daa13.pdf]
