# Supplementary material for: Impact of BECLIN1 haploinsufficiency on goblet cell function and susceptibility to colitis
Source: Research Square preprint supplement (doi:10.21203/rs.3.rs-7567745/v1), 2025-09-19
Supplement: Supplementary file 1 [file 1338e434277f635de073bfe2.docx]

**SUPPLEMENTARY INFORMATION**

**MATERIALS AND METHODS**

**PCR genotyping**

For colony maintenance and gene deletion assessments, DNA was extracted from ear clips or isolated IECs (see IEC isolation method). Samples were incubated overnight at 56°C in DirectPCR (Tail) Lysis Reagent (102-T, Viagen Biotech Inc., Los Angeles, California, USA) supplemented with 0.2% (v/v) Proteinase K (1.07393, Sigma-Aldrich, St. Louis, Missouri, USA), followed by heat inactivation at 85 °C for 1 hour. PCR amplification was performed using GoTaq PCR Master Mix (M7122, Promega, Madison, Wisconsin, USA) according to the manufacturer’s protocol. Primers for *Becn1* reactions were as follows: “Beclin floxed forward” - 5′CTG ATC CTG CAG CTT GCA GAT TAG C3′, “Beclin floxed reverse” - 5′CAC CAC TGC CTG GCT AAA CAA GAG C3′, “Beclin KO reverse”- 5′CTA TAG AAG AAA GGA CTG TTG TGA AC3′. Primers for *Vil1-CreERT2* reactions are as follows: F: 5′CAA GCC TGG CTC GAC GGC C3′, R: 5′CGC GAA CAT CTT CAG GTT CT3′. All primers were purchased from Integrated DNA Technologies as single stranded sequences purified by standard desalting and were resuspended at 10 OD/ml in nuclease-free H2O as working stock solutions. Reactions were cycled as follow: *Becn1* (Step 1: 94° C for 4 minutes, Step 2: 94° C for 30 seconds, Step 3: 55° C for 30 seconds, Step 4: 72° C for 1 minute, Step 5: Repeat steps 2-4 for an additional 29 times, Step 6: 72° C for 5 minutes, Step 7: Hold at 4° C) and *Vil1-CreERT2* (Step 1: 95° C for 5 minutes, Step 2: 94° C for 45 seconds, Step 3: 62° C for 25 seconds, Step 4: 72° C for 1.15 minute, Step 5: Repeat steps 2-4 for an additional 34 times, Step 6: 72° C for 5 minutes, Step 7: Hold at 4° C). Reaction products were electrophoresed on 1.5% (w/v) agarose gels containing SYBRTM Safe DNA Gel Stain (S33102, InvitrogenTM, Waltham, Massachusetts, USA) diluted at 20 000x in TAE buffer (40mM Tris Base, 20mM glacial acetic acid, 1mM EDTA). In all gels, 1 Kb Plus DNA Ladder (10787018, InvitrogenTM, Waltham, Massachusetts, USA) was used as a marker for DNA migration according to size. DNA was visualised *via* UV excitation using the ChemiDocTM Imaging System (Bio-Rad Laboratories, Hercules, California, USA) and images processed with Image Lab (Bio-Rad Laboratories, Hercules, California, USA).

**Quantitative image analysis**

Quantification of the histological colitis score (HCS) was performed using the Aperio ImageScope system (v12.4.2.5010), following the method outlined in (47). Briefly, three distinct layers were defined using different colours: total tissue length, areas of inflammation/injury and areas of erosion/ulceration. The “Pen” tool was used to manually outline the tissue, and the length of each category was measured. The sum of the total segment lengths for each region were then computed, and the percentage of injury and ulceration relative to total length was calculated. HCS was determined using the following formula, based on the assumption that complete epithelial loss (i.e. erosion or ulceration) leads to maximal barrier dysfunction and worsened disease outcomes:

For goblet cell theca area quantification, individual goblet cell theca areas were manually outlined using the “Pen” tool in Aperio ImageScope v12.4.2.5010. The average area per goblet cell was determined by measuring >100 goblet cells per animal.

For quantification of PAS-AB+ve staining in the upper or lower crypts, only fully visible crypts were included in the analysis. PAS-AB+ve stained regions in the top or bottom half of the crypt were manually outlined and measured using the “Pen” tool in Aperio ImageScope.

For quantification of PAS-AB+ve staining in the colon epithelium, analysis was performed using Fiji ImageJ. The length of the muscularis mucosae was measured using the Line tool to obtain a reference length for normalization. The areas of interest (i.e. distal colon) were isolated by defining a Region of Interest (ROI). Colour deconvolution was applied using the “Colour Deconvolution 2” tool to separate PAS+ve, AB+ve, and haematoxylin staining, allowing mucin staining to be distinguished from background and nuclear staining. PAS+ve and AB+ve channels were then thresholded (Image>Adjust>Threshold (default)) to generate binary images. Watershed separation plugin (Process>Binary>Watershed) was applied to separate the structures. PAS+ve or AB+ve areas were quantified by analysing the structures of interest within the ROI (Analyze>Analyze Particle). The total PAS-AB+ve mucin area was obtained by summing the quantified PAS+ve and AB+ve areas.

For quantification of immunofluorescence staining, Fiji ImageJ was used. Spatial calibration was first conducted by setting the appropriate scale for each image (Analyse>Set Scale). Quantification of the size of RAB5 vesicles was performed by manually drawing an ROI comprising of more than 5 contiguous intestinal epithelial cells displaying clear apical-basal orientation, while excluding non-specific or luminal debris staining in the organoid lumen, using the polygonal, freehand and line selection tools. The RAB5 channel was then thresholded to create a binary image containing the structures of interest (Image>Adjust>Threshold (default)) followed by the application of the watershed separation plugin (Process>Binary>Watershed) to separate the structures (referred to herein as particles). The particles within the ROI were then analysed (Analyze>Analyze Particle) to obtain the average size of particle.

Quantification of apical, lateral, basal and cytoplasmic fluorescence signals on whole-mount fluorescence images was conducted by manually drawing ROIs around the relevant structures using the polygonal, freehand and line selection tools and measured using the ‘Measure’ (Analyse>Measure) function. A minimum of 3 ROIs (comprising of >5 cells one after another) per stack, and at least 3 z-sections with clear apical-to-basal orientation, were analysed per organoid.

Co-localisation analysis was performed using the Just Another Colocalisation Plugin (JaCoP; Bioimaging and Optics Platform, BIOP). Otsu thresholding was applied to define object boundaries.

**Statistics and reproducibility**

Numerical source data for all graphs are provided in Materials and Methods and Figure legends. Statistical tests were performed using GraphPad Prism 8 Software (GraphPad, San Diego, California, USA) *via* Student’s unpaired t-tests when comparing between two groups. One-way ANOVA or two-way ANOVA (with Tukey post-hoc comparisons) was used for multiple comparisons. Each mouse was assessed as an individual sample. All data were obtained by performing at least *n* > 2 independent experiments with representative data shown and expressed as the mean ± standard error of the mean (S.E.M). *P values* < 0.05 were considered as statistically significant. Significance levels were split further as follows: ***P* < 0.01, ****P* < 0.001, *****P* < 0.0001.

**SUPPLEMENTARY FIGURE LEGENDS**

**Supplementary Figure 1. Monoallelic *Becn1* deletion in mice results in shortened small intestines and reduced colonic crypt length even when aged up to one month. (A)** Representative PCR genotyping of IECs isolated from different sections of the gastrointestinal tract of both *Becn1+/+;Vil1-CreERT2Cre/+* and *Becn1fl/+;Vil1-CreERT2Cre/+* mice two weeks post-Tamoxifen treatment. Numbers (1-6) correspond to individual animals. Untreated IEC controls (*+/+, fl/+* and *fl/fl*) were isolated from the duodenum of *Becn1+/+;, Becn1fl/+;,* and *Becn1fl/fl;Vil1-CreERT2Cre/+* mice without Tamoxifen treatment. Monoallelic *Becn1* deletion (Pos *fl/+*) is evidenced by the presence of a 398 bp band corresponding to the ‘wild-type (WT)’ allele, the loss or significant reduction of the 510 bp ‘Floxed’ band, and the emergence of a 721 bp band corresponding to the deleted allele (KO). **(B)** Body weight of mice over time, normalised to day 0. Data represent *n* > 6 biologically independent mice of each genotype from *n =* 3 independent experiments. **(C)** Distal colon crypt width of *Becn1+/+* and *Becn1+/-* mice at days 7 and 35 post-tamoxifen administration. Data represent *n* > 4 animals per genotype from *n* = 3 independent experiments. **(D)** Representative images of intestinal tracts of *Becn1+/+* and *Becn1+/-* mice along with the measurements of intestinal length at Day 35 post Tamoxifen administration. Data represent *n* > 3 animals per genotype. **(E)** H&E-stained FFPE sections of *Becn1+/+* and *Becn1+/-* mice intestinal tracts at 35 days post-tamoxifen administration. Scale bars = 200 μm. Data represent *n* = 6 from *n* = 3 independent experiments. Graphs show the mean ± S.E.M. Statistical significance was determined using unpaired (Student’s) t-test. SI: small intestine. Duo: Duodenum. Jej: jejunum. Ile: ileum. Col: colon. BP: base pairs. Pos: positive control. Neg: negative control.

**Supplementary Figure 2. BECLIN1 reduction in intestinal organoids does not inhibit basal autophagic function. (A)** Representative Western immunoblot measuring BECLIN1 levels in *Becn1+/+, Becn1+/- and Becn1-/-* organoids at day 7 post-4HT treatment. **(B)** Western blot assessment of basal autophagy in *Becn1+/+,* *Becn1+/-* and *Becn1-/-* organoids, analysing total levels of P62, LC3B-1 and LC3B-II, with GAPDH serving as a loading control. Images are representative from *n =* 3 independent experiments with *n =* 3 different biological replicates. **(C)** Representative KI-67 immunostaining of FFPE sections from *Becn1+/+* and *Becn1+/-* mice at day 7 post-tamoxifen administration across different segments of the small and large intestine. Red arrowheads indicate intact proliferative activity within the intestinal stem cell compartments. Data represent *n* = 6 from *n* = 3 independent experiments. Scale bar = 100 μm.

**Supplementary Figure 3. Visualisation of RAB5 and E-CADHERIN colocalisation in intestinal organoids.** Representative images of whole-mount immunostained intestinal organoids from *Becn1+/+*, *Becn1+/-* and *Becn1-/-* mice showing RAB5 and E-CADHERIN staining, analysed using BioP-JACoP colocalisation with Otsu thresholding. Colocalised regions between RAB5 and E-CADHERIN are visualised in the MERGE (white) channel. Scale bar = 5 µm.

**Supplementary Figure 4. Baseline characteristics and intestinal length measurements of *Becn1+/+* and *Becn1+/-* mice following DSS or control treatment. (A)** Starting weights of mice used in the experiments, measured at day zero prior to Tamoxifen injections. **(B)** The average amount of daily 2% DSS water intake, obtained by calculating the difference in weights of drinking water bottles at the start and end of experiment and dividing by the number of days the animals received treatment. **(C)** Small intestinal lengths of *Becn1+/+* and *Becn1+/-* mice who received normal drinking water (untreated) or 2% DSS drinking water (2% DSS) at endpoint. Data are representative of at least *n =* 9 biologically independent mice from *n =* 3 independent experiments. Graphs indicate the ± S.E.M. Statistical significance was determined using ordinary one-way ANOVA except in (B) where unpaired (Student’s) t-test was used. **(D)** Number and **(E)** size of lymphoid follicles in the colon of *Becn1+/+* and *Becn1+/-* mice receiving normal drinking water or 2% DSS drinking water, calculated using H&E stained FFPE colon sections. Data are representative of at least *n =* 9 biologically independent mice from *n =* 3 independent experiments. Graphs indicate the ± S.E.M. Statistical significance was determined using ordinary one-way ANOVA except in (B) where unpaired (Student’s) t-test was used.

**Supplementary Figure 5.** Representative PAS-AB-stained distal colonic epithelium, segmented into upper and lower crypt regions as indicated by the dashed line for mucin quantification. Scale bar = 100 μm.
