# Supplementary figures and images for: Impact of BECLIN1 haploinsufficiency on goblet cell function and susceptibility to colitis
Source: Research Square preprint supplement (doi:10.21203/rs.3.rs-7567745/v1), 2025-09-19

A

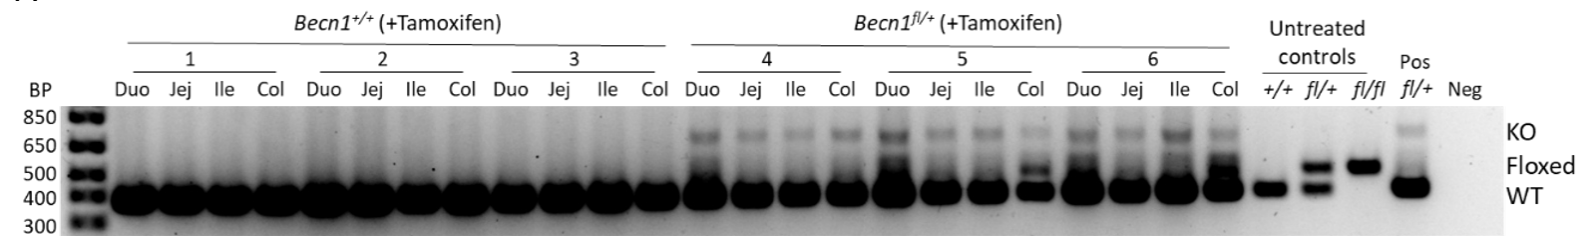

B

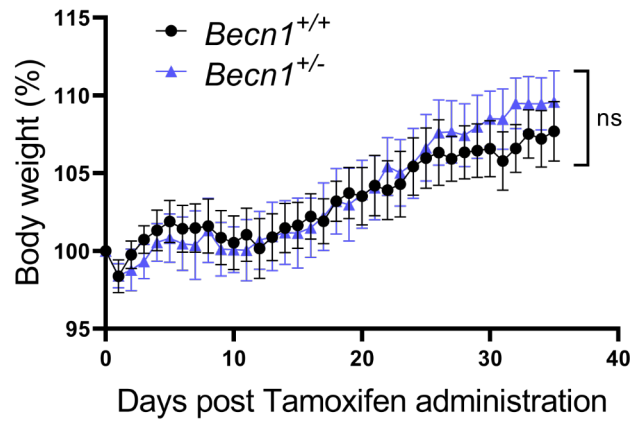

C

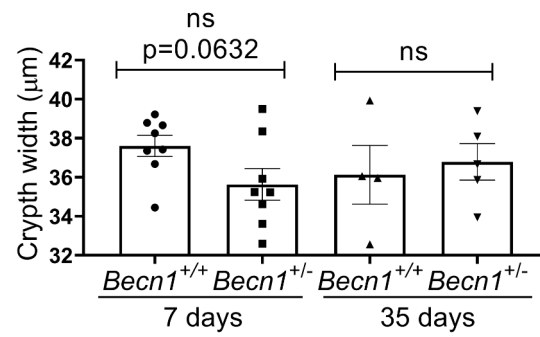

D

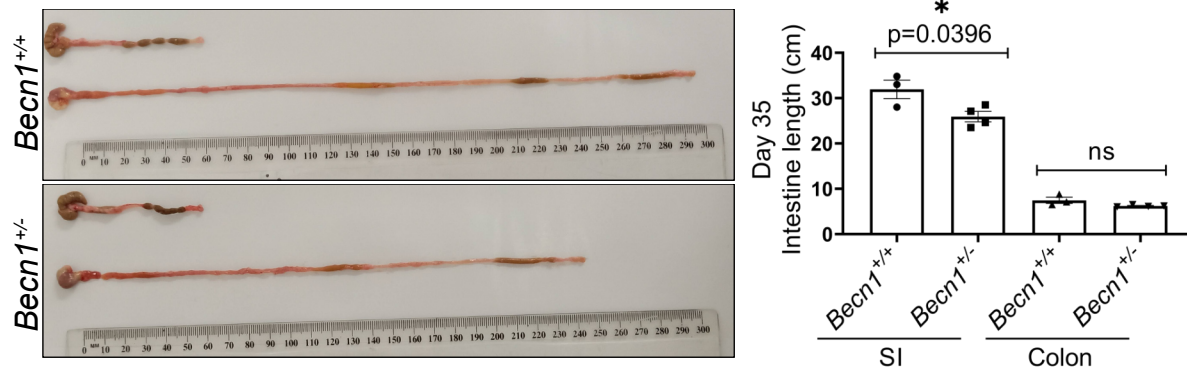

E

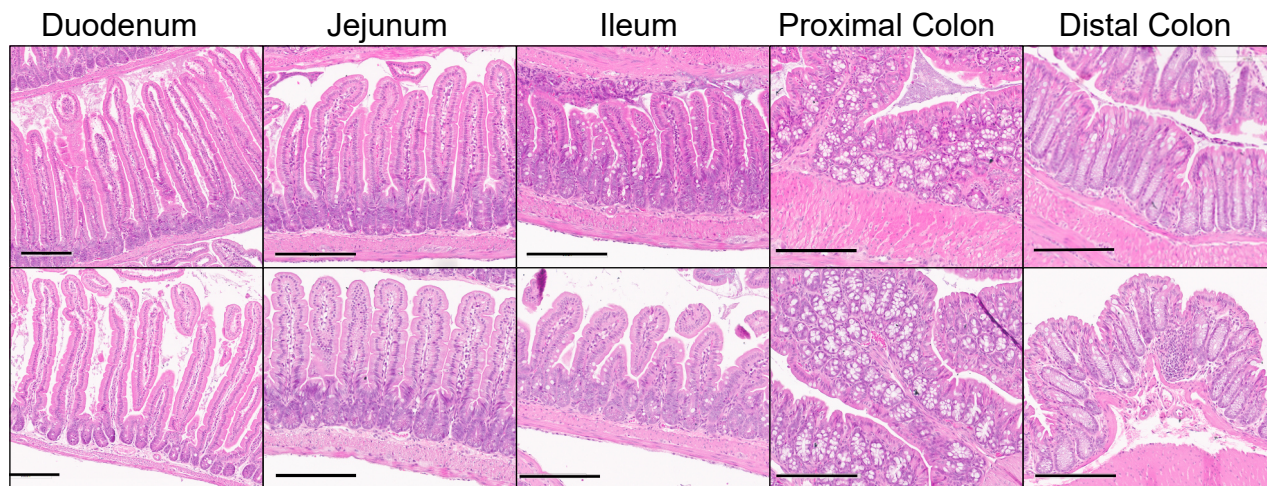

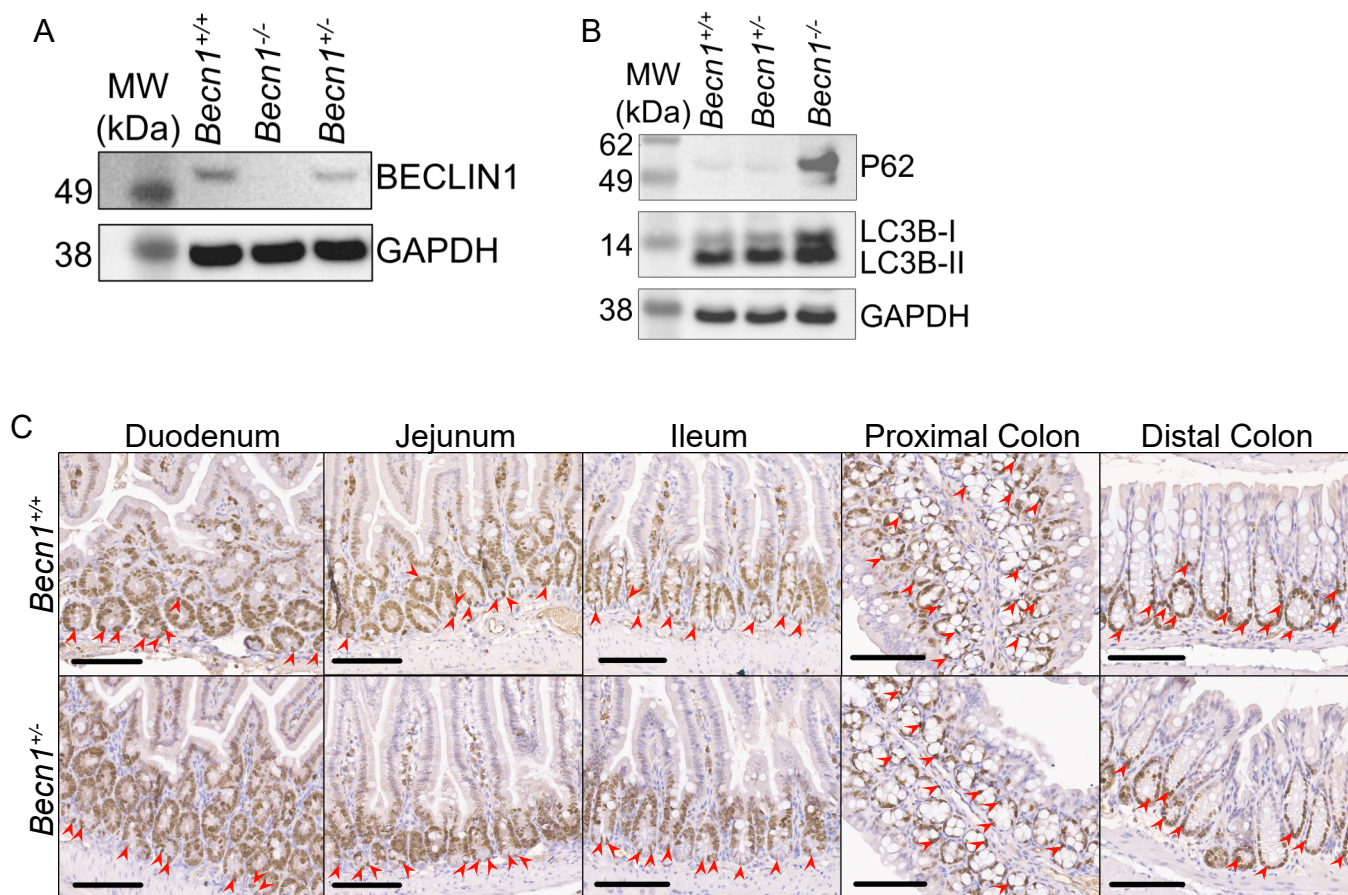

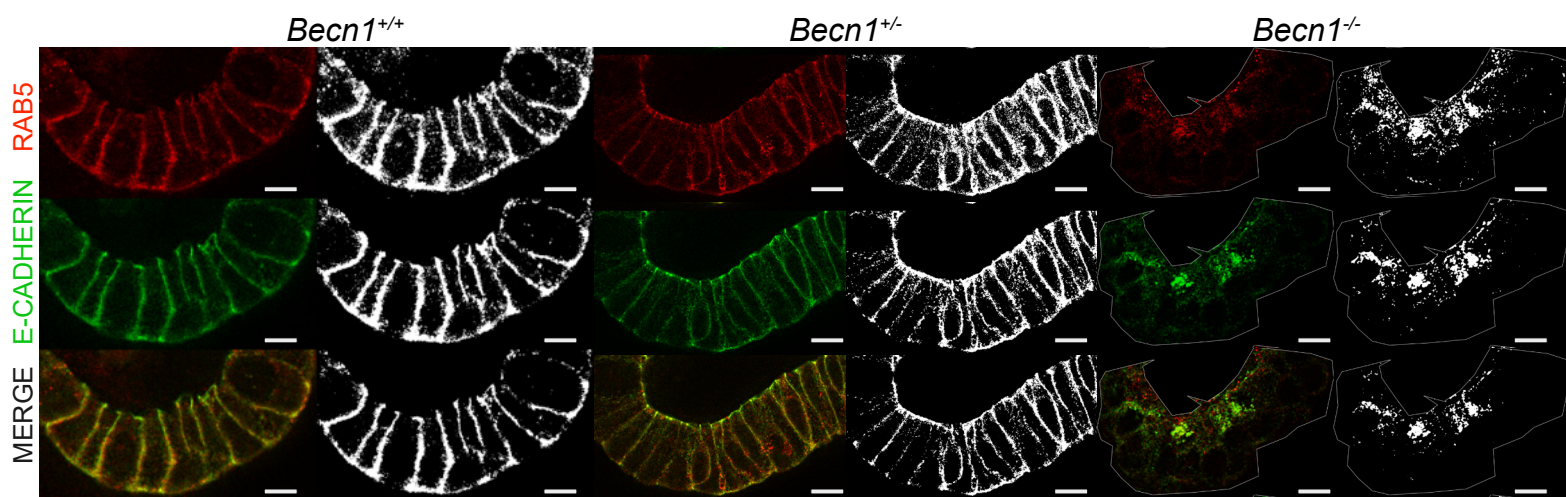

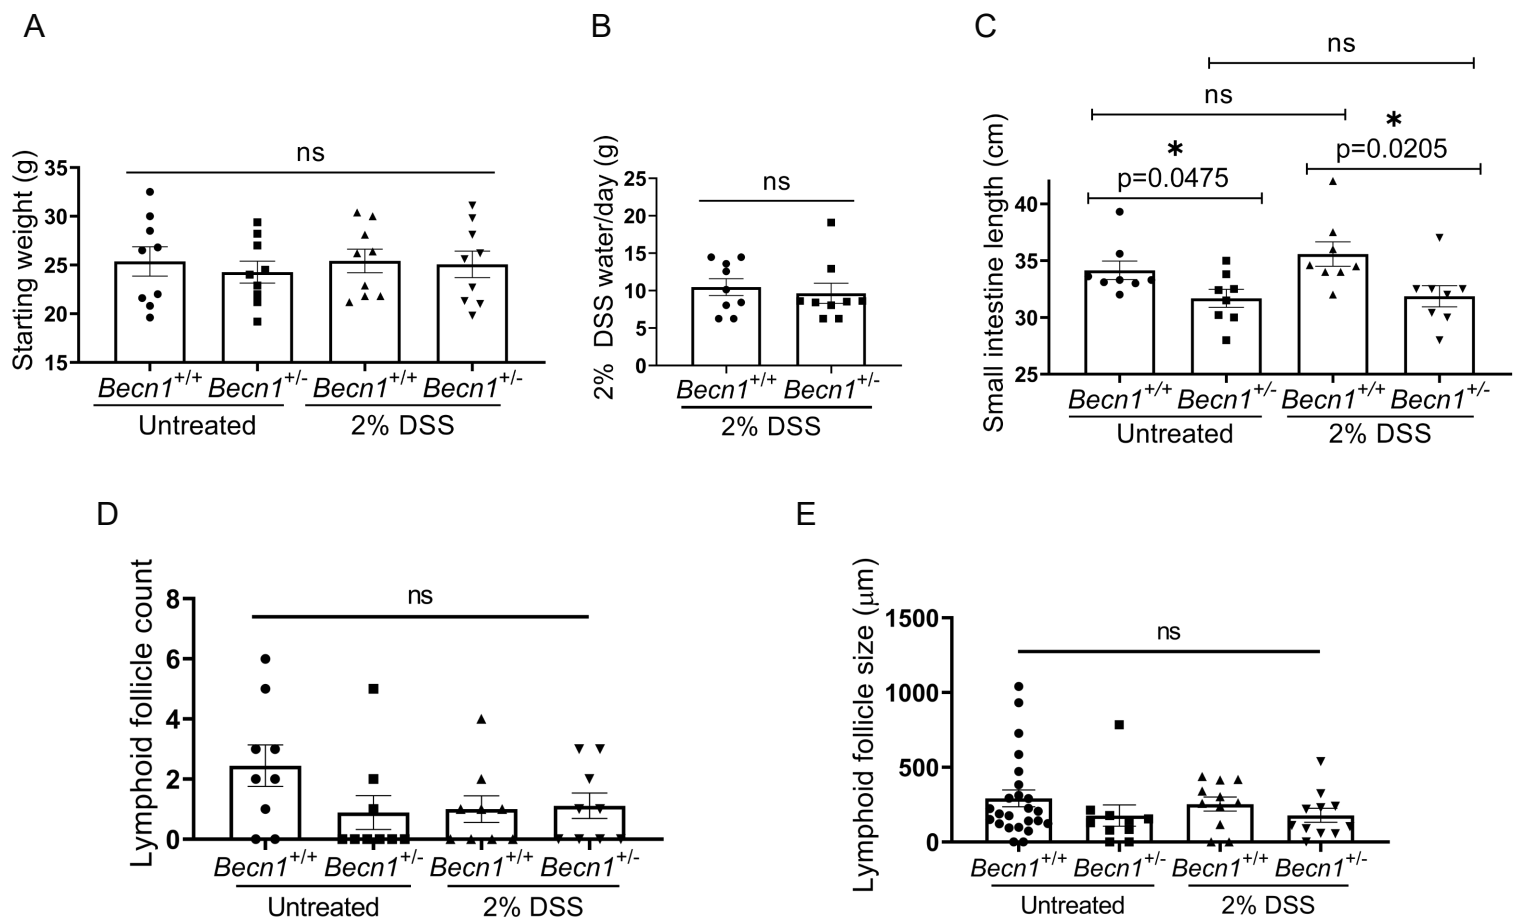

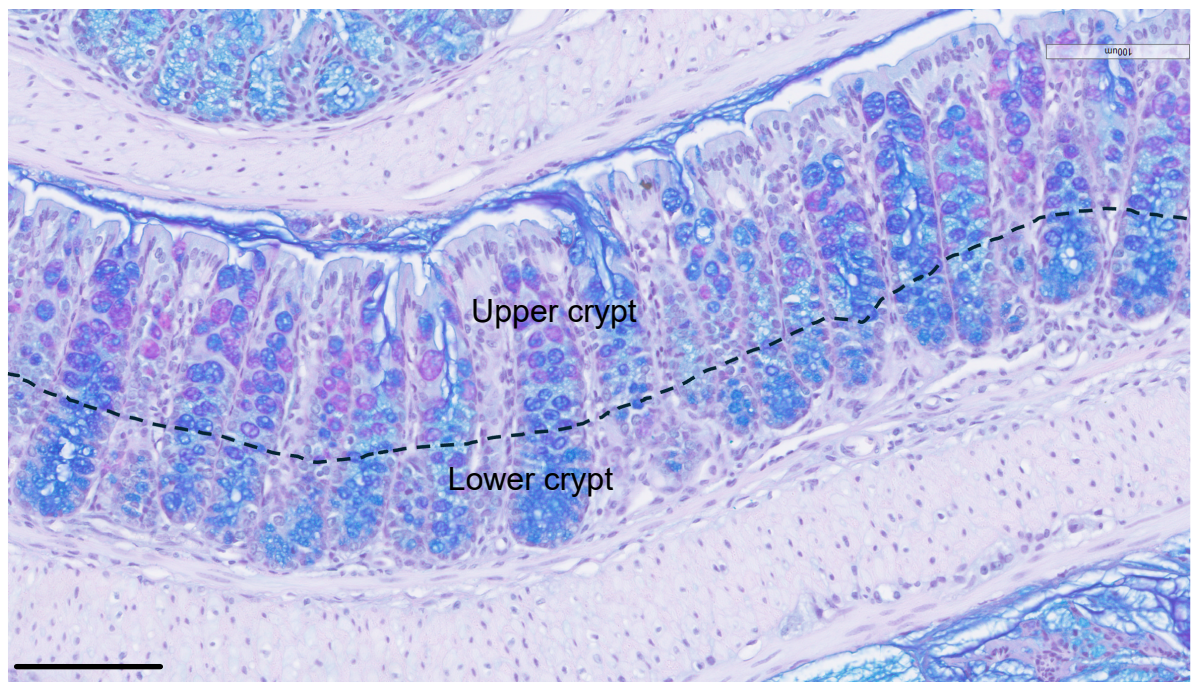

Supplement: Supplementary file 2 [file 534afab61165a77ac901e51c.pdf]
